# Supplementary material for: Analysis of the Risk of Complications During Pregnancy in Pregnant Women With Assisted Reproductive Technology: A Retrospective Study Using Registry Linkage From 2013 to 2018 in Shanghai, China.
Source: Research Square preprint supplement (doi:10.21203/rs.3.rs-1207228/v1), 2022-01-21
Supplement: Supplementary file 1 [file 22b122d6c956317fa393582e.doc]

NOMREG HIP严重程度 (BASE=FIRST ORDER=ASCENDING) BY 分组 仅男性因素不孕 出生胎数 是否GDM WITH 母亲年龄
  /CRITERIA CIN(95) DELTA(0) MXITER(100) MXSTEP(5) CHKSEP(20) LCONVERGE(0) PCONVERGE(0.000001)
    SINGULAR(0.00000001)
  /MODEL
  /STEPWISE=PIN(.05) POUT(0.1) MINEFFECT(0) RULE(SINGLE) ENTRYMETHOD(LR) REMOVALMETHOD(LR)
  /INTERCEPT=INCLUDE
  /PRINT=PARAMETER SUMMARY LRT CPS STEP MFI.


名义回归


备注	
已创建输出	24-JUN-2021 13:37:40	
注释		
输入	数据	C:\Users\Dr. He\Desktop\【文章】FET妊高症风险\【表五】妊高症严重程度.sav	
	活动数据集	数据集7	
	过滤器	<无>	
	权重	<无>	
	拆分文件	<无>	
	工作数据文件中的行数	8102	
缺失值处理	对缺失的定义	将用户定义的缺失值视为缺失。	
	使用的个案数	统计基于所有那些对于模型中的所有变量都具有有效数据的个案。	
语法	NOMREG HIP严重程度 (BASE=FIRST ORDER=ASCENDING) BY 分组 仅男性因素不孕 出生胎数 是否GDM WITH 母亲年龄
  /CRITERIA CIN(95) DELTA(0) MXITER(100) MXSTEP(5) CHKSEP(20) LCONVERGE(0) PCONVERGE(0.000001)
    SINGULAR(0.00000001)
  /MODEL
  /STEPWISE=PIN(.05) POUT(0.1) MINEFFECT(0) RULE(SINGLE) ENTRYMETHOD(LR) REMOVALMETHOD(LR)
  /INTERCEPT=INCLUDE
  /PRINT=PARAMETER SUMMARY LRT CPS STEP MFI.	
资源	处理程序时间	00:00:00.06	
	耗用时间	00:00:00.06	


警告	
在海森矩阵中遇到意外的奇异性。这表明应该排除某些预测变量或者合并某些类别。	
尽管发出了以上警告，但 NOMREG 过程仍将继续运行。显示的后续结果基于最后一次迭代。模型拟合度的有效性不确定。	


个案处理摘要	
	个案数	边际百分比	
HIP严重程度	无HIP	7079	87.4%	
	妊娠期高血压	419	5.2%	
	轻度子痫前期	326	4.0%	
	重度和HELLP	272	3.4%	
分组	自然	5509	68.0%	
	新鲜	2587	32.0%	
仅男性因素不孕	男性正常	6981	86.2%	
	男性不育	1115	13.8%	
出生胎数	1	5954	73.5%	
	2	2135	26.4%	
	3	7	0.1%	
是否GDM	0	6292	77.7%	
	1	1804	22.3%	
有效	8096	100.0%	
缺失	6		
总计	8102		
子群体	308a		

a. 因变量在 118 (38.3%) 子群体中只有一个实测值。	


模型拟合信息	
模型	模型拟合条件	似然比检验	
	-2 对数似然	卡方	自由度	显著性	
仅截距	1910.904				
最终	1599.712	311.192	18	.000	


伪 R 方	
考克斯-斯奈尔	.038	
内戈尔科	.059	
麦克法登	.037	


似然比检验	
效应	模型拟合条件	似然比检验	
	简化模型的 -2 对数似然	卡方	自由度	显著性	
截距	1599.712a	.000	0	.	
母亲年龄	1612.248	12.536	3	.006	
分组	1640.806	41.094	3	.000	
仅男性因素不孕	1605.733	6.022	3	.111	
出生胎数	1835.385	235.674	6	.000	
是否GDM	1613.375	13.664	3	.003	

卡方统计是最终模型与简化模型之间的 -2 对数似然之差。简化模型是通过在最终模型中省略某个效应而形成。原假设是，该效应的所有参数均为 0。	
a. 因为省略此效应并不会增加自由度，所以此简化模型相当于最终模型。	


参数估算值	
HIP严重程度a	B	标准误差	瓦尔德	自由度	显著性				
									
妊娠期高血压	截距	-2.942	1.181	6.205	1	.013				
	母亲年龄	.032	.014	5.290	1	.021				
	[分组=1]	.321	.115	7.797	1	.005				
	[分组=2]	0b	.	.	0	.				
	[仅男性因素不孕=0]	.197	.160	1.523	1	.217				
	[仅男性因素不孕=1]	0b	.	.	0	.				
	[出生胎数=1]	-1.094	1.091	1.006	1	.316				
	[出生胎数=2]	-.894	1.093	.669	1	.414				
	[出生胎数=3]	0b	.	.	0	.				
	[是否GDM=0]	-.375	.112	11.223	1	.001				
	[是否GDM=1]	0b	.	.	0	.				
轻度子痫前期	截距	-16.902	.566	892.501	1	.000				
	母亲年龄	.039	.016	5.952	1	.015				
	[分组=1]	.371	.132	7.966	1	.005				
	[分组=2]	0b	.	.	0	.				
	[仅男性因素不孕=0]	.319	.195	2.685	1	.101				
	[仅男性因素不孕=1]	0b	.	.	0	.				
	[出生胎数=1]	11.665	.116	10093.949	1	.000				
	[出生胎数=2]	13.002	.000	.	1	.				
	[出生胎数=3]	0b	.	.	0	.				
	[是否GDM=0]	-.232	.130	3.166	1	.075				
	[是否GDM=1]	0b	.	.	0	.				
重度和HELLP	截距	-17.121	.623	755.359	1	.000				
	母亲年龄	.029	.018	2.622	1	.105				
	[分组=1]	.792	.160	24.404	1	.000				
	[分组=2]	0b	.	.	0	.				
	[仅男性因素不孕=0]	.300	.216	1.938	1	.164				
	[仅男性因素不孕=1]	0b	.	.	0	.				
	[出生胎数=1]	11.652	.127	8444.685	1	.000				
	[出生胎数=2]	13.032	.000	.	1	.				
	[出生胎数=3]	0b	.	.	0	.				
	[是否GDM=0]	-.144	.145	.980	1	.322				
	[是否GDM=1]	0b	.	.	0	.				

参数估算值	
HIP严重程度a	Exp(B)	Exp(B) 的 95% 置信区间	
		下限	上限	
妊娠期高血压	截距				
	母亲年龄	1.032	1.005	1.061	
	[分组=1]	1.379	1.100	1.728	
	[分组=2]	.	.	.	
	[仅男性因素不孕=0]	1.218	.890	1.667	
	[仅男性因素不孕=1]	.	.	.	
	[出生胎数=1]	.335	.040	2.840	
	[出生胎数=2]	.409	.048	3.485	
	[出生胎数=3]	.	.	.	
	[是否GDM=0]	.688	.552	.856	
	[是否GDM=1]	.	.	.	
轻度子痫前期	截距				
	母亲年龄	1.040	1.008	1.074	
	[分组=1]	1.450	1.120	1.876	
	[分组=2]	.	.	.	
	[仅男性因素不孕=0]	1.376	.939	2.015	
	[仅男性因素不孕=1]	.	.	.	
	[出生胎数=1]	116416.063	92722.266	146164.457	
	[出生胎数=2]	443164.323	443164.323	443164.323	
	[出生胎数=3]	.	.	.	
	[是否GDM=0]	.793	.614	1.024	
	[是否GDM=1]	.	.	.	
重度和HELLP	截距				
	母亲年龄	1.029	.994	1.065	
	[分组=1]	2.209	1.613	3.024	
	[分组=2]	.	.	.	
	[仅男性因素不孕=0]	1.350	.885	2.060	
	[仅男性因素不孕=1]	.	.	.	
	[出生胎数=1]	114953.650	89658.276	147385.630	
	[出生胎数=2]	456665.838	456665.838	456665.838	
	[出生胎数=3]	.	.	.	
	[是否GDM=0]	.866	.652	1.151	
	[是否GDM=1]	.	.	.	

a. 参考类别为：无HIP。	
b. 此参数冗余，因此设置为零。	

NOMREG HIP严重程度 (BASE=FIRST ORDER=ASCENDING) BY 分组
  /CRITERIA CIN(95) DELTA(0) MXITER(100) MXSTEP(5) CHKSEP(20) LCONVERGE(0) PCONVERGE(0.000001)
    SINGULAR(0.00000001)
  /MODEL
  /STEPWISE=PIN(.05) POUT(0.1) MINEFFECT(0) RULE(SINGLE) ENTRYMETHOD(LR) REMOVALMETHOD(LR)
  /INTERCEPT=INCLUDE
  /PRINT=PARAMETER SUMMARY LRT CPS STEP MFI.


名义回归


备注	
已创建输出	24-JUN-2021 13:38:01	
注释		
输入	数据	C:\Users\Dr. He\Desktop\【文章】FET妊高症风险\【表五】妊高症严重程度.sav	
	活动数据集	数据集7	
	过滤器	<无>	
	权重	<无>	
	拆分文件	<无>	
	工作数据文件中的行数	8102	
缺失值处理	对缺失的定义	将用户定义的缺失值视为缺失。	
	使用的个案数	统计基于所有那些对于模型中的所有变量都具有有效数据的个案。	
语法	NOMREG HIP严重程度 (BASE=FIRST ORDER=ASCENDING) BY 分组
  /CRITERIA CIN(95) DELTA(0) MXITER(100) MXSTEP(5) CHKSEP(20) LCONVERGE(0) PCONVERGE(0.000001)
    SINGULAR(0.00000001)
  /MODEL
  /STEPWISE=PIN(.05) POUT(0.1) MINEFFECT(0) RULE(SINGLE) ENTRYMETHOD(LR) REMOVALMETHOD(LR)
  /INTERCEPT=INCLUDE
  /PRINT=PARAMETER SUMMARY LRT CPS STEP MFI.	
资源	处理程序时间	00:00:00.05	
	耗用时间	00:00:00.10	


个案处理摘要	
	个案数	边际百分比	
HIP严重程度	无HIP	7085	87.4%	
	妊娠期高血压	419	5.2%	
	轻度子痫前期	326	4.0%	
	重度和HELLP	272	3.4%	
分组	自然	5513	68.0%	
	新鲜	2589	32.0%	
有效	8102	100.0%	
缺失	0		
总计	8102		
子群体	2		


模型拟合信息	
模型	模型拟合条件	似然比检验	
	-2 对数似然	卡方	自由度	显著性	
仅截距	83.988				
最终	40.441	43.547	3	.000	


伪 R 方	
考克斯-斯奈尔	.005	
内戈尔科	.008	
麦克法登	.005	


似然比检验	
效应	模型拟合条件	似然比检验	
	简化模型的 -2 对数似然	卡方	自由度	显著性	
截距	40.441a	.000	0	.	
分组	83.988	43.547	3	.000	

卡方统计是最终模型与简化模型之间的 -2 对数似然之差。简化模型是通过在最终模型中省略某个效应而形成。原假设是，该效应的所有参数均为 0。	
a. 因为省略此效应并不会增加自由度，所以此简化模型相当于最终模型。	


参数估算值	
HIP严重程度a	B	标准误差	瓦尔德	自由度	显著性	Exp(B)			
									
妊娠期高血压	截距	-3.070	.098	981.430	1	.000				
	[分组=1]	.343	.114	9.011	1	.003	1.409			
	[分组=2]	0b	.	.	0	.	.			
轻度子痫前期	截距	-3.342	.112	895.388	1	.000				
	[分组=1]	.372	.130	8.226	1	.004	1.450			
	[分组=2]	0b	.	.	0	.	.			
重度和HELLP	截距	-3.849	.143	725.240	1	.000				
	[分组=1]	.788	.159	24.709	1	.000	2.199			
	[分组=2]	0b	.	.	0	.	.			

参数估算值	
HIP严重程度a	Exp(B) 的 95% 置信区间	
	下限	上限	
妊娠期高血压	截距			
	[分组=1]	1.126	1.762	
	[分组=2]	.	.	
轻度子痫前期	截距			
	[分组=1]	1.125	1.870	
	[分组=2]	.	.	
重度和HELLP	截距			
	[分组=1]	1.612	3.001	
	[分组=2]	.	.	

a. 参考类别为：无HIP。	
b. 此参数冗余，因此设置为零。	
