# Supplementary material for: Analysis of the Risk of Complications During Pregnancy in Pregnant Women With Assisted Reproductive Technology: A Retrospective Study Using Registry Linkage From 2013 to 2018 in Shanghai, China.
Source: Research Square preprint supplement (doi:10.21203/rs.3.rs-1207228/v1), 2022-01-21
Supplement: Supplementary file 2 [file 7befc04d566a200ec16e7753.doc]

LOGISTIC REGRESSION VARIABLES 是否妊高症
  /METHOD=ENTER 母亲年龄 是否初产妇 是否多次周期 仅男性因素 子宫内膜异位 排卵障碍 输卵管因素 是否FET 是否ICSI 受精卵天数 移植个数 是否多胎 是否巨大儿 是否前置胎盘
    是否GDM
  /CONTRAST (是否FET)=Indicator(1)
  /CONTRAST (是否初产妇)=Indicator(1)
  /CONTRAST (是否多次周期)=Indicator(1)
  /CONTRAST (仅男性因素)=Indicator(1)
  /CONTRAST (子宫内膜异位)=Indicator(1)
  /CONTRAST (排卵障碍)=Indicator(1)
  /CONTRAST (输卵管因素)=Indicator(1)
  /CONTRAST (是否ICSI)=Indicator(1)
  /CONTRAST (受精卵天数)=Indicator(1)
  /CONTRAST (移植个数)=Indicator(1)
  /CONTRAST (是否多胎)=Indicator(1)
  /CONTRAST (是否巨大儿)=Indicator(1)
  /CONTRAST (是否前置胎盘)=Indicator(1)
  /CONTRAST (是否GDM)=Indicator(1)
  /PRINT=CI(95)
  /CRITERIA=PIN(0.05) POUT(0.10) ITERATE(20) CUT(0.5).


Logistic 回归


备注	
已创建输出	22-JUN-2021 14:33:29	
注释		
输入	数据	C:\Users\Dr. He\Desktop\【文章】FET妊高症风险\【表四】妊高症高危因素.sav	
	活动数据集	数据集1	
	过滤器	<无>	
	权重	<无>	
	拆分文件	<无>	
	工作数据文件中的行数	8102	
缺失值处理	对缺失的定义	将用户定义的缺失值视为缺失	
语法	LOGISTIC REGRESSION VARIABLES 是否妊高症
  /METHOD=ENTER 母亲年龄 是否初产妇 是否多次周期 仅男性因素 子宫内膜异位 排卵障碍 输卵管因素 是否FET 是否ICSI 受精卵天数 移植个数 是否多胎 是否巨大儿 是否前置胎盘
    是否GDM
  /CONTRAST (是否FET)=Indicator(1)
  /CONTRAST (是否初产妇)=Indicator(1)
  /CONTRAST (是否多次周期)=Indicator(1)
  /CONTRAST (仅男性因素)=Indicator(1)
  /CONTRAST (子宫内膜异位)=Indicator(1)
  /CONTRAST (排卵障碍)=Indicator(1)
  /CONTRAST (输卵管因素)=Indicator(1)
  /CONTRAST (是否ICSI)=Indicator(1)
  /CONTRAST (受精卵天数)=Indicator(1)
  /CONTRAST (移植个数)=Indicator(1)
  /CONTRAST (是否多胎)=Indicator(1)
  /CONTRAST (是否巨大儿)=Indicator(1)
  /CONTRAST (是否前置胎盘)=Indicator(1)
  /CONTRAST (是否GDM)=Indicator(1)
  /PRINT=CI(95)
  /CRITERIA=PIN(0.05) POUT(0.10) ITERATE(20) CUT(0.5).	
资源	处理程序时间	00:00:00.16	
	耗用时间	00:00:00.15	


个案处理摘要	
未加权个案数a	个案数	百分比	
选定的个案	包括在分析中的个案数	8096	99.9	
	缺失个案数	6	.1	
	总计	8102	100.0	
未选定的个案	0	.0	
总计	8102	100.0	

a. 如果权重处于生效状态，请参阅分类表以了解个案总数。	


因变量编码	
原值	内部值	
0	0	
1	1	


分类变量编码	
	频率	参数编码	
		(1)	(2)	
移植个数	       0	7485	.000	.000	
	       1	414	1.000	.000	
	       3	197	.000	1.000	
受精卵天数	2-3d	7456	.000	.000	
	4d	51	1.000	.000	
	5-6d	589	.000	1.000	
是否GDM	0	6292	.000		
	1	1804	1.000		
是否多次周期	1-2	7475	.000		
	≥3	621	1.000		
仅男性因素	0	6981	.000		
	1	1115	1.000		
子宫内膜异位	0	7966	.000		
	1	130	1.000		
排卵障碍	0	7749	.000		
	1	347	1.000		
输卵管因素	0	4110	.000		
	1	3986	1.000		
是否FET	Fresh	2587	.000		
	FET	5509	1.000		
是否前置胎盘	0	7538	.000		
	1	558	1.000		
是否巨大儿	0	7652	.000		
	1	444	1.000		
是否多胎	单胎	5954	.000		
	多胎	2142	1.000		
是否ICSI	IVF	5139	.000		
	ICSI	2957	1.000		
是否初产妇	0	442	.000		
	1	7654	1.000		


块 0：起始块


分类表a,b	
	实测	预测	
		是否妊高症	正确百分比	
		0	1		
步骤 0	是否妊高症	0	7079	0	100.0	
		1	1017	0	.0	
	总体百分比			87.4	

a. 常量包括在模型中。	
b. 分界值为 .500	


方程中的变量	
	B	标准误差	瓦尔德	自由度	显著性	Exp(B)	
步骤 0	常量	-1.940	.034	3347.720	1	.000	.144	


未包括在方程中的变量	
	得分	自由度	显著性	
步骤 0	变量	母亲年龄	6.433	1	.011	
		是否初产妇(1)	.139	1	.710	
		是否多次周期(1)	2.680	1	.102	
		仅男性因素(1)	13.008	1	.000	
		子宫内膜异位(1)	2.022	1	.155	
		排卵障碍(1)	3.569	1	.059	
		输卵管因素(1)	.203	1	.653	
		是否FET(1)	35.606	1	.000	
		是否ICSI(1)	.442	1	.506	
		受精卵天数	2.041	2	.360	
		受精卵天数(1)	.030	1	.863	
		受精卵天数(2)	2.021	1	.155	
		移植个数	2.648	2	.266	
		移植个数(1)	1.485	1	.223	
		移植个数(2)	1.067	1	.302	
		是否多胎(1)	166.884	1	.000	
		是否巨大儿(1)	7.647	1	.006	
		是否前置胎盘(1)	.168	1	.682	
		是否GDM(1)	16.486	1	.000	
	总体统计	250.528	17	.000	


块 1：方法 = 输入


模型系数的 Omnibus 检验	
	卡方	自由度	显著性	
步骤 1	步骤	240.930	17	.000	
	块	240.930	17	.000	
	模型	240.930	17	.000	


模型摘要	
步骤	-2 对数似然	考克斯-斯奈尔 R 方	内戈尔科 R 方	
1	5879.163a	.029	.055	

a. 由于参数估算值的变化不足 .001，因此估算在第 5 次迭代时终止。	


分类表a	
	实测	预测	
		是否妊高症	正确百分比	
		0	1		
步骤 1	是否妊高症	0	7079	0	100.0	
		1	1017	0	.0	
	总体百分比			87.4	

a. 分界值为 .500	


方程中的变量	
	B	标准误差	瓦尔德	自由度	显著性	Exp(B)			
									
步骤 1a	母亲年龄	.035	.010	12.967	1	.000	1.036			
	是否初产妇(1)	.203	.154	1.735	1	.188	1.225			
	是否多次周期(1)	.114	.123	.857	1	.355	1.121			
	仅男性因素(1)	-.333	.126	7.036	1	.008	.717			
	子宫内膜异位(1)	-.382	.325	1.384	1	.239	.683			
	排卵障碍(1)	.192	.161	1.428	1	.232	1.212			
	输卵管因素(1)	-.024	.078	.094	1	.759	.976			
	是否FET(1)	.422	.081	26.872	1	.000	1.526			
	是否ICSI(1)	.130	.075	3.030	1	.082	1.139			
	受精卵天数			.473	2	.789				
	受精卵天数(1)	.194	.444	.191	1	.662	1.214			
	受精卵天数(2)	.070	.129	.297	1	.586	1.073			
	移植个数			2.365	2	.307				
	移植个数(1)	.083	.171	.236	1	.627	1.087			
	移植个数(2)	-.352	.243	2.098	1	.147	.703			
	是否多胎(1)	.919	.073	159.410	1	.000	2.506			
	是否巨大儿(1)	-.168	.178	.888	1	.346	.845			
	是否前置胎盘(1)	-.164	.137	1.420	1	.233	.849			
	是否GDM(1)	.271	.078	12.205	1	.000	1.312			
	常量	-3.942	.381	107.181	1	.000	.019			

方程中的变量	
	EXP(B) 的 95% 置信区间	
	下限	上限	
步骤 1a	母亲年龄	1.016	1.056	
	是否初产妇(1)	.906	1.657	
	是否多次周期(1)	.880	1.428	
	仅男性因素(1)	.560	.917	
	子宫内膜异位(1)	.361	1.290	
	排卵障碍(1)	.884	1.662	
	输卵管因素(1)	.839	1.137	
	是否FET(1)	1.300	1.790	
	是否ICSI(1)	.984	1.319	
	受精卵天数			
	受精卵天数(1)	.509	2.896	
	受精卵天数(2)	.834	1.380	
	移植个数			
	移植个数(1)	.777	1.521	
	移植个数(2)	.437	1.132	
	是否多胎(1)	2.173	2.890	
	是否巨大儿(1)	.596	1.199	
	是否前置胎盘(1)	.648	1.111	
	是否GDM(1)	1.127	1.527	
	常量			

a. 在步骤 1 输入的变量：母亲年龄, 是否初产妇, 是否多次周期, 仅男性因素, 子宫内膜异位, 排卵障碍, 输卵管因素, 是否FET, 是否ICSI, 受精卵天数, 移植个数, 是否多胎, 是否巨大儿, 是否前置胎盘, 是否GDM。	

LOGISTIC REGRESSION VARIABLES 是否妊高症
  /METHOD=ENTER 母亲年龄
  /PRINT=CI(95)
  /CRITERIA=PIN(0.05) POUT(0.10) ITERATE(20) CUT(0.5).


Logistic 回归


备注	
已创建输出	22-JUN-2021 14:35:07	
注释		
输入	数据	C:\Users\Dr. He\Desktop\【文章】FET妊高症风险\【表四】妊高症高危因素.sav	
	活动数据集	数据集1	
	过滤器	<无>	
	权重	<无>	
	拆分文件	<无>	
	工作数据文件中的行数	8102	
缺失值处理	对缺失的定义	将用户定义的缺失值视为缺失	
语法	LOGISTIC REGRESSION VARIABLES 是否妊高症
  /METHOD=ENTER 母亲年龄
  /PRINT=CI(95)
  /CRITERIA=PIN(0.05) POUT(0.10) ITERATE(20) CUT(0.5).	
资源	处理程序时间	00:00:00.05	
	耗用时间	00:00:00.04	


个案处理摘要	
未加权个案数a	个案数	百分比	
选定的个案	包括在分析中的个案数	8096	99.9	
	缺失个案数	6	.1	
	总计	8102	100.0	
未选定的个案	0	.0	
总计	8102	100.0	

a. 如果权重处于生效状态，请参阅分类表以了解个案总数。	


因变量编码	
原值	内部值	
0	0	
1	1	


块 0：起始块


分类表a,b	
	实测	预测	
		是否妊高症	正确百分比	
		0	1		
步骤 0	是否妊高症	0	7079	0	100.0	
		1	1017	0	.0	
	总体百分比			87.4	

a. 常量包括在模型中。	
b. 分界值为 .500	


方程中的变量	
	B	标准误差	瓦尔德	自由度	显著性	Exp(B)	
步骤 0	常量	-1.940	.034	3347.720	1	.000	.144	


未包括在方程中的变量	
	得分	自由度	显著性	
步骤 0	变量	母亲年龄	6.433	1	.011	
	总体统计	6.433	1	.011	


块 1：方法 = 输入


模型系数的 Omnibus 检验	
	卡方	自由度	显著性	
步骤 1	步骤	6.406	1	.011	
	块	6.406	1	.011	
	模型	6.406	1	.011	


模型摘要	
步骤	-2 对数似然	考克斯-斯奈尔 R 方	内戈尔科 R 方	
1	6113.687a	.001	.001	

a. 由于参数估算值的变化不足 .001，因此估算在第 5 次迭代时终止。	


分类表a	
	实测	预测	
		是否妊高症	正确百分比	
		0	1		
步骤 1	是否妊高症	0	7079	0	100.0	
		1	1017	0	.0	
	总体百分比			87.4	

a. 分界值为 .500	


方程中的变量	
	B	标准误差	瓦尔德	自由度	显著性	Exp(B)			
									
步骤 1a	母亲年龄	.023	.009	6.428	1	.011	1.023			
	常量	-2.694	.300	80.446	1	.000	.068			

方程中的变量	
	EXP(B) 的 95% 置信区间	
	下限	上限	
步骤 1a	母亲年龄	1.005	1.042	
	常量			

a. 在步骤 1 输入的变量：母亲年龄。	

LOGISTIC REGRESSION VARIABLES 是否妊高症
  /METHOD=ENTER 是否初产妇
  /CONTRAST (是否初产妇)=Indicator(1)
  /PRINT=CI(95)
  /CRITERIA=PIN(0.05) POUT(0.10) ITERATE(20) CUT(0.5).


Logistic 回归


备注	
已创建输出	22-JUN-2021 14:35:57	
注释		
输入	数据	C:\Users\Dr. He\Desktop\【文章】FET妊高症风险\【表四】妊高症高危因素.sav	
	活动数据集	数据集1	
	过滤器	<无>	
	权重	<无>	
	拆分文件	<无>	
	工作数据文件中的行数	8102	
缺失值处理	对缺失的定义	将用户定义的缺失值视为缺失	
语法	LOGISTIC REGRESSION VARIABLES 是否妊高症
  /METHOD=ENTER 是否初产妇
  /CONTRAST (是否初产妇)=Indicator(1)
  /PRINT=CI(95)
  /CRITERIA=PIN(0.05) POUT(0.10) ITERATE(20) CUT(0.5).	
资源	处理程序时间	00:00:00.06	
	耗用时间	00:00:00.09	


个案处理摘要	
未加权个案数a	个案数	百分比	
选定的个案	包括在分析中的个案数	8102	100.0	
	缺失个案数	0	.0	
	总计	8102	100.0	
未选定的个案	0	.0	
总计	8102	100.0	

a. 如果权重处于生效状态，请参阅分类表以了解个案总数。	


因变量编码	
原值	内部值	
0	0	
1	1	


分类变量编码	
	频率	参数编码	
		(1)	
是否初产妇	0	443	.000	
	1	7659	1.000	


块 0：起始块


分类表a,b	
	实测	预测	
		是否妊高症	正确百分比	
		0	1		
步骤 0	是否妊高症	0	7085	0	100.0	
		1	1017	0	.0	
	总体百分比			87.4	

a. 常量包括在模型中。	
b. 分界值为 .500	


方程中的变量	
	B	标准误差	瓦尔德	自由度	显著性	Exp(B)	
步骤 0	常量	-1.941	.034	3351.001	1	.000	.144	


未包括在方程中的变量	
	得分	自由度	显著性	
步骤 0	变量	是否初产妇(1)	.148	1	.701	
	总体统计	.148	1	.701	


块 1：方法 = 输入


模型系数的 Omnibus 检验	
	卡方	自由度	显著性	
步骤 1	步骤	.150	1	.699	
	块	.150	1	.699	
	模型	.150	1	.699	


模型摘要	
步骤	-2 对数似然	考克斯-斯奈尔 R 方	内戈尔科 R 方	
1	6121.554a	.000	.000	

a. 由于参数估算值的变化不足 .001，因此估算在第 5 次迭代时终止。	


分类表a	
	实测	预测	
		是否妊高症	正确百分比	
		0	1		
步骤 1	是否妊高症	0	7085	0	100.0	
		1	1017	0	.0	
	总体百分比			87.4	

a. 分界值为 .500	


方程中的变量	
	B	标准误差	瓦尔德	自由度	显著性	Exp(B)			
									
步骤 1a	是否初产妇(1)	.058	.150	.148	1	.701	1.060			
	常量	-1.996	.146	185.864	1	.000	.136			

方程中的变量	
	EXP(B) 的 95% 置信区间	
	下限	上限	
步骤 1a	是否初产妇(1)	.789	1.423	
	常量			

a. 在步骤 1 输入的变量：是否初产妇。	

LOGISTIC REGRESSION VARIABLES 是否妊高症
  /METHOD=ENTER 是否初产妇
  /CONTRAST (是否初产妇)=Indicator(1)
  /PRINT=CI(95)
  /CRITERIA=PIN(0.05) POUT(0.10) ITERATE(20) CUT(0.5).


Logistic 回归


备注	
已创建输出	22-JUN-2021 14:36:13	
注释		
输入	数据	C:\Users\Dr. He\Desktop\【文章】FET妊高症风险\【表四】妊高症高危因素.sav	
	活动数据集	数据集1	
	过滤器	<无>	
	权重	<无>	
	拆分文件	<无>	
	工作数据文件中的行数	8102	
缺失值处理	对缺失的定义	将用户定义的缺失值视为缺失	
语法	LOGISTIC REGRESSION VARIABLES 是否妊高症
  /METHOD=ENTER 是否初产妇
  /CONTRAST (是否初产妇)=Indicator(1)
  /PRINT=CI(95)
  /CRITERIA=PIN(0.05) POUT(0.10) ITERATE(20) CUT(0.5).	
资源	处理程序时间	00:00:00.05	
	耗用时间	00:00:00.04	


个案处理摘要	
未加权个案数a	个案数	百分比	
选定的个案	包括在分析中的个案数	8102	100.0	
	缺失个案数	0	.0	
	总计	8102	100.0	
未选定的个案	0	.0	
总计	8102	100.0	

a. 如果权重处于生效状态，请参阅分类表以了解个案总数。	


因变量编码	
原值	内部值	
0	0	
1	1	


分类变量编码	
	频率	参数编码	
		(1)	
是否初产妇	0	443	.000	
	1	7659	1.000	


块 0：起始块


分类表a,b	
	实测	预测	
		是否妊高症	正确百分比	
		0	1		
步骤 0	是否妊高症	0	7085	0	100.0	
		1	1017	0	.0	
	总体百分比			87.4	

a. 常量包括在模型中。	
b. 分界值为 .500	


方程中的变量	
	B	标准误差	瓦尔德	自由度	显著性	Exp(B)	
步骤 0	常量	-1.941	.034	3351.001	1	.000	.144	


未包括在方程中的变量	
	得分	自由度	显著性	
步骤 0	变量	是否初产妇(1)	.148	1	.701	
	总体统计	.148	1	.701	


块 1：方法 = 输入


模型系数的 Omnibus 检验	
	卡方	自由度	显著性	
步骤 1	步骤	.150	1	.699	
	块	.150	1	.699	
	模型	.150	1	.699	


模型摘要	
步骤	-2 对数似然	考克斯-斯奈尔 R 方	内戈尔科 R 方	
1	6121.554a	.000	.000	

a. 由于参数估算值的变化不足 .001，因此估算在第 5 次迭代时终止。	


分类表a	
	实测	预测	
		是否妊高症	正确百分比	
		0	1		
步骤 1	是否妊高症	0	7085	0	100.0	
		1	1017	0	.0	
	总体百分比			87.4	

a. 分界值为 .500	


方程中的变量	
	B	标准误差	瓦尔德	自由度	显著性	Exp(B)			
									
步骤 1a	是否初产妇(1)	.058	.150	.148	1	.701	1.060			
	常量	-1.996	.146	185.864	1	.000	.136			

方程中的变量	
	EXP(B) 的 95% 置信区间	
	下限	上限	
步骤 1a	是否初产妇(1)	.789	1.423	
	常量			

a. 在步骤 1 输入的变量：是否初产妇。	

LOGISTIC REGRESSION VARIABLES 是否妊高症
  /METHOD=ENTER 是否多次周期
  /CONTRAST (是否多次周期)=Indicator(1)
  /PRINT=CI(95)
  /CRITERIA=PIN(0.05) POUT(0.10) ITERATE(20) CUT(0.5).


Logistic 回归


备注	
已创建输出	22-JUN-2021 14:37:12	
注释		
输入	数据	C:\Users\Dr. He\Desktop\【文章】FET妊高症风险\【表四】妊高症高危因素.sav	
	活动数据集	数据集1	
	过滤器	<无>	
	权重	<无>	
	拆分文件	<无>	
	工作数据文件中的行数	8102	
缺失值处理	对缺失的定义	将用户定义的缺失值视为缺失	
语法	LOGISTIC REGRESSION VARIABLES 是否妊高症
  /METHOD=ENTER 是否多次周期
  /CONTRAST (是否多次周期)=Indicator(1)
  /PRINT=CI(95)
  /CRITERIA=PIN(0.05) POUT(0.10) ITERATE(20) CUT(0.5).	
资源	处理程序时间	00:00:00.05	
	耗用时间	00:00:00.08	


个案处理摘要	
未加权个案数a	个案数	百分比	
选定的个案	包括在分析中的个案数	8102	100.0	
	缺失个案数	0	.0	
	总计	8102	100.0	
未选定的个案	0	.0	
总计	8102	100.0	

a. 如果权重处于生效状态，请参阅分类表以了解个案总数。	


因变量编码	
原值	内部值	
0	0	
1	1	


分类变量编码	
	频率	参数编码	
		(1)	
是否多次周期	1-2	7481	.000	
	≥3	621	1.000	


块 0：起始块


分类表a,b	
	实测	预测	
		是否妊高症	正确百分比	
		0	1		
步骤 0	是否妊高症	0	7085	0	100.0	
		1	1017	0	.0	
	总体百分比			87.4	

a. 常量包括在模型中。	
b. 分界值为 .500	


方程中的变量	
	B	标准误差	瓦尔德	自由度	显著性	Exp(B)	
步骤 0	常量	-1.941	.034	3351.001	1	.000	.144	


未包括在方程中的变量	
	得分	自由度	显著性	
步骤 0	变量	是否多次周期(1)	2.705	1	.100	
	总体统计	2.705	1	.100	


块 1：方法 = 输入


模型系数的 Omnibus 检验	
	卡方	自由度	显著性	
步骤 1	步骤	2.596	1	.107	
	块	2.596	1	.107	
	模型	2.596	1	.107	


模型摘要	
步骤	-2 对数似然	考克斯-斯奈尔 R 方	内戈尔科 R 方	
1	6119.107a	.000	.001	

a. 由于参数估算值的变化不足 .001，因此估算在第 5 次迭代时终止。	


分类表a	
	实测	预测	
		是否妊高症	正确百分比	
		0	1		
步骤 1	是否妊高症	0	7085	0	100.0	
		1	1017	0	.0	
	总体百分比			87.4	

a. 分界值为 .500	


方程中的变量	
	B	标准误差	瓦尔德	自由度	显著性	Exp(B)			
									
步骤 1a	是否多次周期(1)	.195	.119	2.698	1	.100	1.215			
	常量	-1.957	.035	3107.808	1	.000	.141			

方程中的变量	
	EXP(B) 的 95% 置信区间	
	下限	上限	
步骤 1a	是否多次周期(1)	.963	1.534	
	常量			

a. 在步骤 1 输入的变量：是否多次周期。	

LOGISTIC REGRESSION VARIABLES 是否妊高症
  /METHOD=ENTER 仅男性因素
  /CONTRAST (仅男性因素)=Indicator(1)
  /PRINT=CI(95)
  /CRITERIA=PIN(0.05) POUT(0.10) ITERATE(20) CUT(0.5).


Logistic 回归


备注	
已创建输出	22-JUN-2021 14:38:47	
注释		
输入	数据	C:\Users\Dr. He\Desktop\【文章】FET妊高症风险\【表四】妊高症高危因素.sav	
	活动数据集	数据集1	
	过滤器	<无>	
	权重	<无>	
	拆分文件	<无>	
	工作数据文件中的行数	8102	
缺失值处理	对缺失的定义	将用户定义的缺失值视为缺失	
语法	LOGISTIC REGRESSION VARIABLES 是否妊高症
  /METHOD=ENTER 仅男性因素
  /CONTRAST (仅男性因素)=Indicator(1)
  /PRINT=CI(95)
  /CRITERIA=PIN(0.05) POUT(0.10) ITERATE(20) CUT(0.5).	
资源	处理程序时间	00:00:00.05	
	耗用时间	00:00:00.07	


个案处理摘要	
未加权个案数a	个案数	百分比	
选定的个案	包括在分析中的个案数	8102	100.0	
	缺失个案数	0	.0	
	总计	8102	100.0	
未选定的个案	0	.0	
总计	8102	100.0	

a. 如果权重处于生效状态，请参阅分类表以了解个案总数。	


因变量编码	
原值	内部值	
0	0	
1	1	


分类变量编码	
	频率	参数编码	
		(1)	
仅男性因素	0	6986	.000	
	1	1116	1.000	


块 0：起始块


分类表a,b	
	实测	预测	
		是否妊高症	正确百分比	
		0	1		
步骤 0	是否妊高症	0	7085	0	100.0	
		1	1017	0	.0	
	总体百分比			87.4	

a. 常量包括在模型中。	
b. 分界值为 .500	


方程中的变量	
	B	标准误差	瓦尔德	自由度	显著性	Exp(B)	
步骤 0	常量	-1.941	.034	3351.001	1	.000	.144	


未包括在方程中的变量	
	得分	自由度	显著性	
步骤 0	变量	仅男性因素(1)	13.021	1	.000	
	总体统计	13.021	1	.000	


块 1：方法 = 输入


模型系数的 Omnibus 检验	
	卡方	自由度	显著性	
步骤 1	步骤	13.985	1	.000	
	块	13.985	1	.000	
	模型	13.985	1	.000	


模型摘要	
步骤	-2 对数似然	考克斯-斯奈尔 R 方	内戈尔科 R 方	
1	6107.718a	.002	.003	

a. 由于参数估算值的变化不足 .001，因此估算在第 5 次迭代时终止。	


分类表a	
	实测	预测	
		是否妊高症	正确百分比	
		0	1		
步骤 1	是否妊高症	0	7085	0	100.0	
		1	1017	0	.0	
	总体百分比			87.4	

a. 分界值为 .500	


方程中的变量	
	B	标准误差	瓦尔德	自由度	显著性	Exp(B)			
									
步骤 1a	仅男性因素(1)	-.392	.109	12.876	1	.000	.675			
	常量	-1.894	.035	2848.602	1	.000	.151			

方程中的变量	
	EXP(B) 的 95% 置信区间	
	下限	上限	
步骤 1a	仅男性因素(1)	.545	.837	
	常量			

a. 在步骤 1 输入的变量：仅男性因素。	

LOGISTIC REGRESSION VARIABLES 是否妊高症
  /METHOD=ENTER 子宫内膜异位
  /CONTRAST (子宫内膜异位)=Indicator(1)
  /PRINT=CI(95)
  /CRITERIA=PIN(0.05) POUT(0.10) ITERATE(20) CUT(0.5).


Logistic 回归


备注	
已创建输出	22-JUN-2021 14:40:43	
注释		
输入	数据	C:\Users\Dr. He\Desktop\【文章】FET妊高症风险\【表四】妊高症高危因素.sav	
	活动数据集	数据集1	
	过滤器	<无>	
	权重	<无>	
	拆分文件	<无>	
	工作数据文件中的行数	8102	
缺失值处理	对缺失的定义	将用户定义的缺失值视为缺失	
语法	LOGISTIC REGRESSION VARIABLES 是否妊高症
  /METHOD=ENTER 子宫内膜异位
  /CONTRAST (子宫内膜异位)=Indicator(1)
  /PRINT=CI(95)
  /CRITERIA=PIN(0.05) POUT(0.10) ITERATE(20) CUT(0.5).	
资源	处理程序时间	00:00:00.06	
	耗用时间	00:00:00.08	


个案处理摘要	
未加权个案数a	个案数	百分比	
选定的个案	包括在分析中的个案数	8102	100.0	
	缺失个案数	0	.0	
	总计	8102	100.0	
未选定的个案	0	.0	
总计	8102	100.0	

a. 如果权重处于生效状态，请参阅分类表以了解个案总数。	


因变量编码	
原值	内部值	
0	0	
1	1	


分类变量编码	
	频率	参数编码	
		(1)	
子宫内膜异位	0	7972	.000	
	1	130	1.000	


块 0：起始块


分类表a,b	
	实测	预测	
		是否妊高症	正确百分比	
		0	1		
步骤 0	是否妊高症	0	7085	0	100.0	
		1	1017	0	.0	
	总体百分比			87.4	

a. 常量包括在模型中。	
b. 分界值为 .500	


方程中的变量	
	B	标准误差	瓦尔德	自由度	显著性	Exp(B)	
步骤 0	常量	-1.941	.034	3351.001	1	.000	.144	


未包括在方程中的变量	
	得分	自由度	显著性	
步骤 0	变量	子宫内膜异位(1)	2.014	1	.156	
	总体统计	2.014	1	.156	


块 1：方法 = 输入


模型系数的 Omnibus 检验	
	卡方	自由度	显著性	
步骤 1	步骤	2.237	1	.135	
	块	2.237	1	.135	
	模型	2.237	1	.135	


模型摘要	
步骤	-2 对数似然	考克斯-斯奈尔 R 方	内戈尔科 R 方	
1	6119.466a	.000	.001	

a. 由于参数估算值的变化不足 .001，因此估算在第 5 次迭代时终止。	


分类表a	
	实测	预测	
		是否妊高症	正确百分比	
		0	1		
步骤 1	是否妊高症	0	7085	0	100.0	
		1	1017	0	.0	
	总体百分比			87.4	

a. 分界值为 .500	


方程中的变量	
	B	标准误差	瓦尔德	自由度	显著性	Exp(B)			
									
步骤 1a	子宫内膜异位(1)	-.446	.317	1.982	1	.159	.640			
	常量	-1.935	.034	3291.566	1	.000	.144			

方程中的变量	
	EXP(B) 的 95% 置信区间	
	下限	上限	
步骤 1a	子宫内膜异位(1)	.344	1.191	
	常量			

a. 在步骤 1 输入的变量：子宫内膜异位。	

LOGISTIC REGRESSION VARIABLES 是否妊高症
  /METHOD=ENTER 排卵障碍
  /CONTRAST (排卵障碍)=Indicator(1)
  /PRINT=CI(95)
  /CRITERIA=PIN(0.05) POUT(0.10) ITERATE(20) CUT(0.5).


Logistic 回归


备注	
已创建输出	22-JUN-2021 14:41:38	
注释		
输入	数据	C:\Users\Dr. He\Desktop\【文章】FET妊高症风险\【表四】妊高症高危因素.sav	
	活动数据集	数据集1	
	过滤器	<无>	
	权重	<无>	
	拆分文件	<无>	
	工作数据文件中的行数	8102	
缺失值处理	对缺失的定义	将用户定义的缺失值视为缺失	
语法	LOGISTIC REGRESSION VARIABLES 是否妊高症
  /METHOD=ENTER 排卵障碍
  /CONTRAST (排卵障碍)=Indicator(1)
  /PRINT=CI(95)
  /CRITERIA=PIN(0.05) POUT(0.10) ITERATE(20) CUT(0.5).	
资源	处理程序时间	00:00:00.09	
	耗用时间	00:00:00.10	


个案处理摘要	
未加权个案数a	个案数	百分比	
选定的个案	包括在分析中的个案数	8102	100.0	
	缺失个案数	0	.0	
	总计	8102	100.0	
未选定的个案	0	.0	
总计	8102	100.0	

a. 如果权重处于生效状态，请参阅分类表以了解个案总数。	


因变量编码	
原值	内部值	
0	0	
1	1	


分类变量编码	
	频率	参数编码	
		(1)	
排卵障碍	0	7755	.000	
	1	347	1.000	


块 0：起始块


分类表a,b	
	实测	预测	
		是否妊高症	正确百分比	
		0	1		
步骤 0	是否妊高症	0	7085	0	100.0	
		1	1017	0	.0	
	总体百分比			87.4	

a. 常量包括在模型中。	
b. 分界值为 .500	


方程中的变量	
	B	标准误差	瓦尔德	自由度	显著性	Exp(B)	
步骤 0	常量	-1.941	.034	3351.001	1	.000	.144	


未包括在方程中的变量	
	得分	自由度	显著性	
步骤 0	变量	排卵障碍(1)	3.592	1	.058	
	总体统计	3.592	1	.058	


块 1：方法 = 输入


模型系数的 Omnibus 检验	
	卡方	自由度	显著性	
步骤 1	步骤	3.364	1	.067	
	块	3.364	1	.067	
	模型	3.364	1	.067	


模型摘要	
步骤	-2 对数似然	考克斯-斯奈尔 R 方	内戈尔科 R 方	
1	6118.339a	.000	.001	

a. 由于参数估算值的变化不足 .001，因此估算在第 5 次迭代时终止。	


分类表a	
	实测	预测	
		是否妊高症	正确百分比	
		0	1		
步骤 1	是否妊高症	0	7085	0	100.0	
		1	1017	0	.0	
	总体百分比			87.4	

a. 分界值为 .500	


方程中的变量	
	B	标准误差	瓦尔德	自由度	显著性	Exp(B)			
									
步骤 1a	排卵障碍(1)	.285	.151	3.569	1	.059	1.330			
	常量	-1.955	.034	3219.479	1	.000	.142			

方程中的变量	
	EXP(B) 的 95% 置信区间	
	下限	上限	
步骤 1a	排卵障碍(1)	.989	1.788	
	常量			

a. 在步骤 1 输入的变量：排卵障碍。	

LOGISTIC REGRESSION VARIABLES 是否妊高症
  /METHOD=ENTER 输卵管因素
  /CONTRAST (输卵管因素)=Indicator(1)
  /PRINT=CI(95)
  /CRITERIA=PIN(0.05) POUT(0.10) ITERATE(20) CUT(0.5).


Logistic 回归


备注	
已创建输出	22-JUN-2021 14:42:34	
注释		
输入	数据	C:\Users\Dr. He\Desktop\【文章】FET妊高症风险\【表四】妊高症高危因素.sav	
	活动数据集	数据集1	
	过滤器	<无>	
	权重	<无>	
	拆分文件	<无>	
	工作数据文件中的行数	8102	
缺失值处理	对缺失的定义	将用户定义的缺失值视为缺失	
语法	LOGISTIC REGRESSION VARIABLES 是否妊高症
  /METHOD=ENTER 输卵管因素
  /CONTRAST (输卵管因素)=Indicator(1)
  /PRINT=CI(95)
  /CRITERIA=PIN(0.05) POUT(0.10) ITERATE(20) CUT(0.5).	
资源	处理程序时间	00:00:00.05	
	耗用时间	00:00:00.08	


个案处理摘要	
未加权个案数a	个案数	百分比	
选定的个案	包括在分析中的个案数	8102	100.0	
	缺失个案数	0	.0	
	总计	8102	100.0	
未选定的个案	0	.0	
总计	8102	100.0	

a. 如果权重处于生效状态，请参阅分类表以了解个案总数。	


因变量编码	
原值	内部值	
0	0	
1	1	


分类变量编码	
	频率	参数编码	
		(1)	
输卵管因素	0	4111	.000	
	1	3991	1.000	


块 0：起始块


分类表a,b	
	实测	预测	
		是否妊高症	正确百分比	
		0	1		
步骤 0	是否妊高症	0	7085	0	100.0	
		1	1017	0	.0	
	总体百分比			87.4	

a. 常量包括在模型中。	
b. 分界值为 .500	


方程中的变量	
	B	标准误差	瓦尔德	自由度	显著性	Exp(B)	
步骤 0	常量	-1.941	.034	3351.001	1	.000	.144	


未包括在方程中的变量	
	得分	自由度	显著性	
步骤 0	变量	输卵管因素(1)	.218	1	.640	
	总体统计	.218	1	.640	


块 1：方法 = 输入


模型系数的 Omnibus 检验	
	卡方	自由度	显著性	
步骤 1	步骤	.218	1	.640	
	块	.218	1	.640	
	模型	.218	1	.640	


模型摘要	
步骤	-2 对数似然	考克斯-斯奈尔 R 方	内戈尔科 R 方	
1	6121.485a	.000	.000	

a. 由于参数估算值的变化不足 .001，因此估算在第 5 次迭代时终止。	


分类表a	
	实测	预测	
		是否妊高症	正确百分比	
		0	1		
步骤 1	是否妊高症	0	7085	0	100.0	
		1	1017	0	.0	
	总体百分比			87.4	

a. 分界值为 .500	


方程中的变量	
	B	标准误差	瓦尔德	自由度	显著性	Exp(B)			
									
步骤 1a	输卵管因素(1)	-.031	.067	.218	1	.640	.969			
	常量	-1.926	.047	1692.836	1	.000	.146			

方程中的变量	
	EXP(B) 的 95% 置信区间	
	下限	上限	
步骤 1a	输卵管因素(1)	.850	1.105	
	常量			

a. 在步骤 1 输入的变量：输卵管因素。	

LOGISTIC REGRESSION VARIABLES 是否妊高症
  /METHOD=ENTER 是否FET
  /CONTRAST (是否FET)=Indicator(1)
  /PRINT=CI(95)
  /CRITERIA=PIN(0.05) POUT(0.10) ITERATE(20) CUT(0.5).


Logistic 回归


备注	
已创建输出	22-JUN-2021 14:43:43	
注释		
输入	数据	C:\Users\Dr. He\Desktop\【文章】FET妊高症风险\【表四】妊高症高危因素.sav	
	活动数据集	数据集1	
	过滤器	<无>	
	权重	<无>	
	拆分文件	<无>	
	工作数据文件中的行数	8102	
缺失值处理	对缺失的定义	将用户定义的缺失值视为缺失	
语法	LOGISTIC REGRESSION VARIABLES 是否妊高症
  /METHOD=ENTER 是否FET
  /CONTRAST (是否FET)=Indicator(1)
  /PRINT=CI(95)
  /CRITERIA=PIN(0.05) POUT(0.10) ITERATE(20) CUT(0.5).	
资源	处理程序时间	00:00:00.06	
	耗用时间	00:00:00.08	


个案处理摘要	
未加权个案数a	个案数	百分比	
选定的个案	包括在分析中的个案数	8102	100.0	
	缺失个案数	0	.0	
	总计	8102	100.0	
未选定的个案	0	.0	
总计	8102	100.0	

a. 如果权重处于生效状态，请参阅分类表以了解个案总数。	


因变量编码	
原值	内部值	
0	0	
1	1	


分类变量编码	
	频率	参数编码	
		(1)	
是否FET	Fresh	2589	.000	
	FET	5513	1.000	


块 0：起始块


分类表a,b	
	实测	预测	
		是否妊高症	正确百分比	
		0	1		
步骤 0	是否妊高症	0	7085	0	100.0	
		1	1017	0	.0	
	总体百分比			87.4	

a. 常量包括在模型中。	
b. 分界值为 .500	


方程中的变量	
	B	标准误差	瓦尔德	自由度	显著性	Exp(B)	
步骤 0	常量	-1.941	.034	3351.001	1	.000	.144	


未包括在方程中的变量	
	得分	自由度	显著性	
步骤 0	变量	是否FET(1)	35.610	1	.000	
	总体统计	35.610	1	.000	


块 1：方法 = 输入


模型系数的 Omnibus 检验	
	卡方	自由度	显著性	
步骤 1	步骤	37.283	1	.000	
	块	37.283	1	.000	
	模型	37.283	1	.000	


模型摘要	
步骤	-2 对数似然	考克斯-斯奈尔 R 方	内戈尔科 R 方	
1	6084.421a	.005	.009	

a. 由于参数估算值的变化不足 .001，因此估算在第 5 次迭代时终止。	


分类表a	
	实测	预测	
		是否妊高症	正确百分比	
		0	1		
步骤 1	是否妊高症	0	7085	0	100.0	
		1	1017	0	.0	
	总体百分比			87.4	

a. 分界值为 .500	


方程中的变量	
	B	标准误差	瓦尔德	自由度	显著性	Exp(B)			
									
步骤 1a	是否FET(1)	.461	.078	35.139	1	.000	1.586			
	常量	-2.272	.068	1132.390	1	.000	.103			

方程中的变量	
	EXP(B) 的 95% 置信区间	
	下限	上限	
步骤 1a	是否FET(1)	1.362	1.848	
	常量			

a. 在步骤 1 输入的变量：是否FET。	

LOGISTIC REGRESSION VARIABLES 是否妊高症
  /METHOD=ENTER 是否ICSI
  /CONTRAST (是否ICSI)=Indicator(1)
  /PRINT=CI(95)
  /CRITERIA=PIN(0.05) POUT(0.10) ITERATE(20) CUT(0.5).


Logistic 回归


备注	
已创建输出	22-JUN-2021 14:44:46	
注释		
输入	数据	C:\Users\Dr. He\Desktop\【文章】FET妊高症风险\【表四】妊高症高危因素.sav	
	活动数据集	数据集1	
	过滤器	<无>	
	权重	<无>	
	拆分文件	<无>	
	工作数据文件中的行数	8102	
缺失值处理	对缺失的定义	将用户定义的缺失值视为缺失	
语法	LOGISTIC REGRESSION VARIABLES 是否妊高症
  /METHOD=ENTER 是否ICSI
  /CONTRAST (是否ICSI)=Indicator(1)
  /PRINT=CI(95)
  /CRITERIA=PIN(0.05) POUT(0.10) ITERATE(20) CUT(0.5).	
资源	处理程序时间	00:00:00.08	
	耗用时间	00:00:00.08	


个案处理摘要	
未加权个案数a	个案数	百分比	
选定的个案	包括在分析中的个案数	8102	100.0	
	缺失个案数	0	.0	
	总计	8102	100.0	
未选定的个案	0	.0	
总计	8102	100.0	

a. 如果权重处于生效状态，请参阅分类表以了解个案总数。	


因变量编码	
原值	内部值	
0	0	
1	1	


分类变量编码	
	频率	参数编码	
		(1)	
是否ICSI	IVF	5144	.000	
	ICSI	2958	1.000	


块 0：起始块


分类表a,b	
	实测	预测	
		是否妊高症	正确百分比	
		0	1		
步骤 0	是否妊高症	0	7085	0	100.0	
		1	1017	0	.0	
	总体百分比			87.4	

a. 常量包括在模型中。	
b. 分界值为 .500	


方程中的变量	
	B	标准误差	瓦尔德	自由度	显著性	Exp(B)	
步骤 0	常量	-1.941	.034	3351.001	1	.000	.144	


未包括在方程中的变量	
	得分	自由度	显著性	
步骤 0	变量	是否ICSI(1)	.456	1	.499	
	总体统计	.456	1	.499	


块 1：方法 = 输入


模型系数的 Omnibus 检验	
	卡方	自由度	显著性	
步骤 1	步骤	.455	1	.500	
	块	.455	1	.500	
	模型	.455	1	.500	


模型摘要	
步骤	-2 对数似然	考克斯-斯奈尔 R 方	内戈尔科 R 方	
1	6121.249a	.000	.000	

a. 由于参数估算值的变化不足 .001，因此估算在第 5 次迭代时终止。	


分类表a	
	实测	预测	
		是否妊高症	正确百分比	
		0	1		
步骤 1	是否妊高症	0	7085	0	100.0	
		1	1017	0	.0	
	总体百分比			87.4	

a. 分界值为 .500	


方程中的变量	
	B	标准误差	瓦尔德	自由度	显著性	Exp(B)			
									
步骤 1a	是否ICSI(1)	.047	.069	.456	1	.499	1.048			
	常量	-1.958	.042	2137.703	1	.000	.141			

方程中的变量	
	EXP(B) 的 95% 置信区间	
	下限	上限	
步骤 1a	是否ICSI(1)	.915	1.200	
	常量			

a. 在步骤 1 输入的变量：是否ICSI。	

LOGISTIC REGRESSION VARIABLES 是否妊高症
  /METHOD=ENTER 受精卵天数
  /CONTRAST (受精卵天数)=Indicator(1)
  /PRINT=CI(95)
  /CRITERIA=PIN(0.05) POUT(0.10) ITERATE(20) CUT(0.5).


Logistic 回归


备注	
已创建输出	22-JUN-2021 14:45:52	
注释		
输入	数据	C:\Users\Dr. He\Desktop\【文章】FET妊高症风险\【表四】妊高症高危因素.sav	
	活动数据集	数据集1	
	过滤器	<无>	
	权重	<无>	
	拆分文件	<无>	
	工作数据文件中的行数	8102	
缺失值处理	对缺失的定义	将用户定义的缺失值视为缺失	
语法	LOGISTIC REGRESSION VARIABLES 是否妊高症
  /METHOD=ENTER 受精卵天数
  /CONTRAST (受精卵天数)=Indicator(1)
  /PRINT=CI(95)
  /CRITERIA=PIN(0.05) POUT(0.10) ITERATE(20) CUT(0.5).	
资源	处理程序时间	00:00:00.08	
	耗用时间	00:00:00.08	


个案处理摘要	
未加权个案数a	个案数	百分比	
选定的个案	包括在分析中的个案数	8102	100.0	
	缺失个案数	0	.0	
	总计	8102	100.0	
未选定的个案	0	.0	
总计	8102	100.0	

a. 如果权重处于生效状态，请参阅分类表以了解个案总数。	


因变量编码	
原值	内部值	
0	0	
1	1	


分类变量编码	
	频率	参数编码	
		(1)	(2)	
受精卵天数	2-3d	7462	.000	.000	
	4d	51	1.000	.000	
	5-6d	589	.000	1.000	


块 0：起始块


分类表a,b	
	实测	预测	
		是否妊高症	正确百分比	
		0	1		
步骤 0	是否妊高症	0	7085	0	100.0	
		1	1017	0	.0	
	总体百分比			87.4	

a. 常量包括在模型中。	
b. 分界值为 .500	


方程中的变量	
	B	标准误差	瓦尔德	自由度	显著性	Exp(B)	
步骤 0	常量	-1.941	.034	3351.001	1	.000	.144	


未包括在方程中的变量	
	得分	自由度	显著性	
步骤 0	变量	受精卵天数	2.062	2	.357	
		受精卵天数(1)	.029	1	.865	
		受精卵天数(2)	2.043	1	.153	
	总体统计	2.062	2	.357	


块 1：方法 = 输入


模型系数的 Omnibus 检验	
	卡方	自由度	显著性	
步骤 1	步骤	1.987	2	.370	
	块	1.987	2	.370	
	模型	1.987	2	.370	


模型摘要	
步骤	-2 对数似然	考克斯-斯奈尔 R 方	内戈尔科 R 方	
1	6119.716a	.000	.000	

a. 由于参数估算值的变化不足 .001，因此估算在第 5 次迭代时终止。	


分类表a	
	实测	预测	
		是否妊高症	正确百分比	
		0	1		
步骤 1	是否妊高症	0	7085	0	100.0	
		1	1017	0	.0	
	总体百分比			87.4	

a. 分界值为 .500	


方程中的变量	
	B	标准误差	瓦尔德	自由度	显著性	Exp(B)			
									
步骤 1a	受精卵天数			2.057	2	.358				
	受精卵天数(1)	-.061	.436	.019	1	.889	.941			
	受精卵天数(2)	.174	.122	2.027	1	.154	1.190			
	常量	-1.954	.035	3097.481	1	.000	.142			

方程中的变量	
	EXP(B) 的 95% 置信区间	
	下限	上限	
步骤 1a	受精卵天数			
	受精卵天数(1)	.400	2.212	
	受精卵天数(2)	.936	1.513	
	常量			

a. 在步骤 1 输入的变量：受精卵天数。	

LOGISTIC REGRESSION VARIABLES 是否妊高症
  /METHOD=ENTER 移植个数
  /CONTRAST (移植个数)=Indicator(1)
  /PRINT=CI(95)
  /CRITERIA=PIN(0.05) POUT(0.10) ITERATE(20) CUT(0.5).


Logistic 回归


备注	
已创建输出	22-JUN-2021 14:48:28	
注释		
输入	数据	C:\Users\Dr. He\Desktop\【文章】FET妊高症风险\【表四】妊高症高危因素.sav	
	活动数据集	数据集1	
	过滤器	<无>	
	权重	<无>	
	拆分文件	<无>	
	工作数据文件中的行数	8102	
缺失值处理	对缺失的定义	将用户定义的缺失值视为缺失	
语法	LOGISTIC REGRESSION VARIABLES 是否妊高症
  /METHOD=ENTER 移植个数
  /CONTRAST (移植个数)=Indicator(1)
  /PRINT=CI(95)
  /CRITERIA=PIN(0.05) POUT(0.10) ITERATE(20) CUT(0.5).	
资源	处理程序时间	00:00:00.06	
	耗用时间	00:00:00.08	


个案处理摘要	
未加权个案数a	个案数	百分比	
选定的个案	包括在分析中的个案数	8102	100.0	
	缺失个案数	0	.0	
	总计	8102	100.0	
未选定的个案	0	.0	
总计	8102	100.0	

a. 如果权重处于生效状态，请参阅分类表以了解个案总数。	


因变量编码	
原值	内部值	
0	0	
1	1	


分类变量编码	
	频率	参数编码	
		(1)	(2)	
移植个数	       0	7489	.000	.000	
	       1	415	1.000	.000	
	       3	198	.000	1.000	


块 0：起始块


分类表a,b	
	实测	预测	
		是否妊高症	正确百分比	
		0	1		
步骤 0	是否妊高症	0	7085	0	100.0	
		1	1017	0	.0	
	总体百分比			87.4	

a. 常量包括在模型中。	
b. 分界值为 .500	


方程中的变量	
	B	标准误差	瓦尔德	自由度	显著性	Exp(B)	
步骤 0	常量	-1.941	.034	3351.001	1	.000	.144	


未包括在方程中的变量	
	得分	自由度	显著性	
步骤 0	变量	移植个数	2.726	2	.256	
		移植个数(1)	1.515	1	.218	
		移植个数(2)	1.111	1	.292	
	总体统计	2.726	2	.256	


块 1：方法 = 输入


模型系数的 Omnibus 检验	
	卡方	自由度	显著性	
步骤 1	步骤	2.861	2	.239	
	块	2.861	2	.239	
	模型	2.861	2	.239	


模型摘要	
步骤	-2 对数似然	考克斯-斯奈尔 R 方	内戈尔科 R 方	
1	6118.842a	.000	.001	

a. 由于参数估算值的变化不足 .001，因此估算在第 5 次迭代时终止。	


分类表a	
	实测	预测	
		是否妊高症	正确百分比	
		0	1		
步骤 1	是否妊高症	0	7085	0	100.0	
		1	1017	0	.0	
	总体百分比			87.4	

a. 分界值为 .500	


方程中的变量	
	B	标准误差	瓦尔德	自由度	显著性	Exp(B)			
									
步骤 1a	移植个数			2.714	2	.257				
	移植个数(1)	-.207	.163	1.602	1	.206	.813			
	移植个数(2)	-.261	.238	1.195	1	.274	.771			
	常量	-1.925	.035	3083.562	1	.000	.146			

方程中的变量	
	EXP(B) 的 95% 置信区间	
	下限	上限	
步骤 1a	移植个数			
	移植个数(1)	.591	1.120	
	移植个数(2)	.483	1.230	
	常量			

a. 在步骤 1 输入的变量：移植个数。	

LOGISTIC REGRESSION VARIABLES 是否妊高症
  /METHOD=ENTER 是否多胎
  /CONTRAST (是否多胎)=Indicator(1)
  /PRINT=CI(95)
  /CRITERIA=PIN(0.05) POUT(0.10) ITERATE(20) CUT(0.5).


Logistic 回归


备注	
已创建输出	22-JUN-2021 14:50:18	
注释		
输入	数据	C:\Users\Dr. He\Desktop\【文章】FET妊高症风险\【表四】妊高症高危因素.sav	
	活动数据集	数据集1	
	过滤器	<无>	
	权重	<无>	
	拆分文件	<无>	
	工作数据文件中的行数	8102	
缺失值处理	对缺失的定义	将用户定义的缺失值视为缺失	
语法	LOGISTIC REGRESSION VARIABLES 是否妊高症
  /METHOD=ENTER 是否多胎
  /CONTRAST (是否多胎)=Indicator(1)
  /PRINT=CI(95)
  /CRITERIA=PIN(0.05) POUT(0.10) ITERATE(20) CUT(0.5).	
资源	处理程序时间	00:00:00.03	
	耗用时间	00:00:00.06	


个案处理摘要	
未加权个案数a	个案数	百分比	
选定的个案	包括在分析中的个案数	8102	100.0	
	缺失个案数	0	.0	
	总计	8102	100.0	
未选定的个案	0	.0	
总计	8102	100.0	

a. 如果权重处于生效状态，请参阅分类表以了解个案总数。	


因变量编码	
原值	内部值	
0	0	
1	1	


分类变量编码	
	频率	参数编码	
		(1)	
是否多胎	单胎	5960	.000	
	多胎	2142	1.000	


块 0：起始块


分类表a,b	
	实测	预测	
		是否妊高症	正确百分比	
		0	1		
步骤 0	是否妊高症	0	7085	0	100.0	
		1	1017	0	.0	
	总体百分比			87.4	

a. 常量包括在模型中。	
b. 分界值为 .500	


方程中的变量	
	B	标准误差	瓦尔德	自由度	显著性	Exp(B)	
步骤 0	常量	-1.941	.034	3351.001	1	.000	.144	


未包括在方程中的变量	
	得分	自由度	显著性	
步骤 0	变量	是否多胎(1)	167.338	1	.000	
	总体统计	167.338	1	.000	


块 1：方法 = 输入


模型系数的 Omnibus 检验	
	卡方	自由度	显著性	
步骤 1	步骤	153.637	1	.000	
	块	153.637	1	.000	
	模型	153.637	1	.000	


模型摘要	
步骤	-2 对数似然	考克斯-斯奈尔 R 方	内戈尔科 R 方	
1	5968.067a	.019	.035	

a. 由于参数估算值的变化不足 .001，因此估算在第 5 次迭代时终止。	


分类表a	
	实测	预测	
		是否妊高症	正确百分比	
		0	1		
步骤 1	是否妊高症	0	7085	0	100.0	
		1	1017	0	.0	
	总体百分比			87.4	

a. 分界值为 .500	


方程中的变量	
	B	标准误差	瓦尔德	自由度	显著性	Exp(B)			
									
步骤 1a	是否多胎(1)	.876	.069	160.356	1	.000	2.400			
	常量	-2.231	.044	2598.474	1	.000	.107			

方程中的变量	
	EXP(B) 的 95% 置信区间	
	下限	上限	
步骤 1a	是否多胎(1)	2.096	2.749	
	常量			

a. 在步骤 1 输入的变量：是否多胎。	

LOGISTIC REGRESSION VARIABLES 是否妊高症
  /METHOD=ENTER 是否巨大儿
  /CONTRAST (是否巨大儿)=Indicator(1)
  /PRINT=CI(95)
  /CRITERIA=PIN(0.05) POUT(0.10) ITERATE(20) CUT(0.5).


Logistic 回归


备注	
已创建输出	22-JUN-2021 14:51:11	
注释		
输入	数据	C:\Users\Dr. He\Desktop\【文章】FET妊高症风险\【表四】妊高症高危因素.sav	
	活动数据集	数据集1	
	过滤器	<无>	
	权重	<无>	
	拆分文件	<无>	
	工作数据文件中的行数	8102	
缺失值处理	对缺失的定义	将用户定义的缺失值视为缺失	
语法	LOGISTIC REGRESSION VARIABLES 是否妊高症
  /METHOD=ENTER 是否巨大儿
  /CONTRAST (是否巨大儿)=Indicator(1)
  /PRINT=CI(95)
  /CRITERIA=PIN(0.05) POUT(0.10) ITERATE(20) CUT(0.5).	
资源	处理程序时间	00:00:00.06	
	耗用时间	00:00:00.13	


个案处理摘要	
未加权个案数a	个案数	百分比	
选定的个案	包括在分析中的个案数	8102	100.0	
	缺失个案数	0	.0	
	总计	8102	100.0	
未选定的个案	0	.0	
总计	8102	100.0	

a. 如果权重处于生效状态，请参阅分类表以了解个案总数。	


因变量编码	
原值	内部值	
0	0	
1	1	


分类变量编码	
	频率	参数编码	
		(1)	
是否巨大儿	0	7657	.000	
	1	445	1.000	


块 0：起始块


分类表a,b	
	实测	预测	
		是否妊高症	正确百分比	
		0	1		
步骤 0	是否妊高症	0	7085	0	100.0	
		1	1017	0	.0	
	总体百分比			87.4	

a. 常量包括在模型中。	
b. 分界值为 .500	


方程中的变量	
	B	标准误差	瓦尔德	自由度	显著性	Exp(B)	
步骤 0	常量	-1.941	.034	3351.001	1	.000	.144	


未包括在方程中的变量	
	得分	自由度	显著性	
步骤 0	变量	是否巨大儿(1)	7.704	1	.006	
	总体统计	7.704	1	.006	


块 1：方法 = 输入


模型系数的 Omnibus 检验	
	卡方	自由度	显著性	
步骤 1	步骤	8.556	1	.003	
	块	8.556	1	.003	
	模型	8.556	1	.003	


模型摘要	
步骤	-2 对数似然	考克斯-斯奈尔 R 方	内戈尔科 R 方	
1	6113.147a	.001	.002	

a. 由于参数估算值的变化不足 .001，因此估算在第 5 次迭代时终止。	


分类表a	
	实测	预测	
		是否妊高症	正确百分比	
		0	1		
步骤 1	是否妊高症	0	7085	0	100.0	
		1	1017	0	.0	
	总体百分比			87.4	

a. 分界值为 .500	


方程中的变量	
	B	标准误差	瓦尔德	自由度	显著性	Exp(B)			
									
步骤 1a	是否巨大儿(1)	-.481	.175	7.564	1	.006	.618			
	常量	-1.919	.034	3146.593	1	.000	.147			

方程中的变量	
	EXP(B) 的 95% 置信区间	
	下限	上限	
步骤 1a	是否巨大儿(1)	.438	.871	
	常量			

a. 在步骤 1 输入的变量：是否巨大儿。	

LOGISTIC REGRESSION VARIABLES 是否妊高症
  /METHOD=ENTER 是否前置胎盘
  /CONTRAST (是否前置胎盘)=Indicator(1)
  /PRINT=CI(95)
  /CRITERIA=PIN(0.05) POUT(0.10) ITERATE(20) CUT(0.5).


Logistic 回归


备注	
已创建输出	22-JUN-2021 14:52:49	
注释		
输入	数据	C:\Users\Dr. He\Desktop\【文章】FET妊高症风险\【表四】妊高症高危因素.sav	
	活动数据集	数据集1	
	过滤器	<无>	
	权重	<无>	
	拆分文件	<无>	
	工作数据文件中的行数	8102	
缺失值处理	对缺失的定义	将用户定义的缺失值视为缺失	
语法	LOGISTIC REGRESSION VARIABLES 是否妊高症
  /METHOD=ENTER 是否前置胎盘
  /CONTRAST (是否前置胎盘)=Indicator(1)
  /PRINT=CI(95)
  /CRITERIA=PIN(0.05) POUT(0.10) ITERATE(20) CUT(0.5).	
资源	处理程序时间	00:00:00.06	
	耗用时间	00:00:00.06	


个案处理摘要	
未加权个案数a	个案数	百分比	
选定的个案	包括在分析中的个案数	8102	100.0	
	缺失个案数	0	.0	
	总计	8102	100.0	
未选定的个案	0	.0	
总计	8102	100.0	

a. 如果权重处于生效状态，请参阅分类表以了解个案总数。	


因变量编码	
原值	内部值	
0	0	
1	1	


分类变量编码	
	频率	参数编码	
		(1)	
是否前置胎盘	0	7544	.000	
	1	558	1.000	


块 0：起始块


分类表a,b	
	实测	预测	
		是否妊高症	正确百分比	
		0	1		
步骤 0	是否妊高症	0	7085	0	100.0	
		1	1017	0	.0	
	总体百分比			87.4	

a. 常量包括在模型中。	
b. 分界值为 .500	


方程中的变量	
	B	标准误差	瓦尔德	自由度	显著性	Exp(B)	
步骤 0	常量	-1.941	.034	3351.001	1	.000	.144	


未包括在方程中的变量	
	得分	自由度	显著性	
步骤 0	变量	是否前置胎盘(1)	.162	1	.687	
	总体统计	.162	1	.687	


块 1：方法 = 输入


模型系数的 Omnibus 检验	
	卡方	自由度	显著性	
步骤 1	步骤	.164	1	.685	
	块	.164	1	.685	
	模型	.164	1	.685	


模型摘要	
步骤	-2 对数似然	考克斯-斯奈尔 R 方	内戈尔科 R 方	
1	6121.539a	.000	.000	

a. 由于参数估算值的变化不足 .001，因此估算在第 5 次迭代时终止。	


分类表a	
	实测	预测	
		是否妊高症	正确百分比	
		0	1		
步骤 1	是否妊高症	0	7085	0	100.0	
		1	1017	0	.0	
	总体百分比			87.4	

a. 分界值为 .500	


方程中的变量	
	B	标准误差	瓦尔德	自由度	显著性	Exp(B)			
									
步骤 1a	是否前置胎盘(1)	-.054	.135	.162	1	.687	.947			
	常量	-1.937	.035	3116.976	1	.000	.144			

方程中的变量	
	EXP(B) 的 95% 置信区间	
	下限	上限	
步骤 1a	是否前置胎盘(1)	.727	1.234	
	常量			

a. 在步骤 1 输入的变量：是否前置胎盘。	

LOGISTIC REGRESSION VARIABLES 是否妊高症
  /METHOD=ENTER 是否GDM
  /CONTRAST (是否GDM)=Indicator(1)
  /PRINT=CI(95)
  /CRITERIA=PIN(0.05) POUT(0.10) ITERATE(20) CUT(0.5).


Logistic 回归


备注	
已创建输出	22-JUN-2021 14:53:55	
注释		
输入	数据	C:\Users\Dr. He\Desktop\【文章】FET妊高症风险\【表四】妊高症高危因素.sav	
	活动数据集	数据集1	
	过滤器	<无>	
	权重	<无>	
	拆分文件	<无>	
	工作数据文件中的行数	8102	
缺失值处理	对缺失的定义	将用户定义的缺失值视为缺失	
语法	LOGISTIC REGRESSION VARIABLES 是否妊高症
  /METHOD=ENTER 是否GDM
  /CONTRAST (是否GDM)=Indicator(1)
  /PRINT=CI(95)
  /CRITERIA=PIN(0.05) POUT(0.10) ITERATE(20) CUT(0.5).	
资源	处理程序时间	00:00:00.08	
	耗用时间	00:00:00.08	


个案处理摘要	
未加权个案数a	个案数	百分比	
选定的个案	包括在分析中的个案数	8102	100.0	
	缺失个案数	0	.0	
	总计	8102	100.0	
未选定的个案	0	.0	
总计	8102	100.0	

a. 如果权重处于生效状态，请参阅分类表以了解个案总数。	


因变量编码	
原值	内部值	
0	0	
1	1	


分类变量编码	
	频率	参数编码	
		(1)	
是否GDM	0	6296	.000	
	1	1806	1.000	


块 0：起始块


分类表a,b	
	实测	预测	
		是否妊高症	正确百分比	
		0	1		
步骤 0	是否妊高症	0	7085	0	100.0	
		1	1017	0	.0	
	总体百分比			87.4	

a. 常量包括在模型中。	
b. 分界值为 .500	


方程中的变量	
	B	标准误差	瓦尔德	自由度	显著性	Exp(B)	
步骤 0	常量	-1.941	.034	3351.001	1	.000	.144	


未包括在方程中的变量	
	得分	自由度	显著性	
步骤 0	变量	是否GDM(1)	16.425	1	.000	
	总体统计	16.425	1	.000	


块 1：方法 = 输入


模型系数的 Omnibus 检验	
	卡方	自由度	显著性	
步骤 1	步骤	15.767	1	.000	
	块	15.767	1	.000	
	模型	15.767	1	.000	


模型摘要	
步骤	-2 对数似然	考克斯-斯奈尔 R 方	内戈尔科 R 方	
1	6105.937a	.002	.004	

a. 由于参数估算值的变化不足 .001，因此估算在第 5 次迭代时终止。	


分类表a	
	实测	预测	
		是否妊高症	正确百分比	
		0	1		
步骤 1	是否妊高症	0	7085	0	100.0	
		1	1017	0	.0	
	总体百分比			87.4	

a. 分界值为 .500	


方程中的变量	
	B	标准误差	瓦尔德	自由度	显著性	Exp(B)			
									
步骤 1a	是否GDM(1)	.308	.076	16.330	1	.000	1.360			
	常量	-2.016	.039	2654.014	1	.000	.133			

方程中的变量	
	EXP(B) 的 95% 置信区间	
	下限	上限	
步骤 1a	是否GDM(1)	1.172	1.579	
	常量			

a. 在步骤 1 输入的变量：是否GDM。	


备注	
已创建输出	23-JUN-2021 08:40:57	
注释		
输入	数据	C:\Users\Dr. He\Desktop\【文章】FET妊高症风险\【表五】妊高症严重程度.sav	
	活动数据集	数据集4	
	过滤器	<无>	
	权重	<无>	
	拆分文件	<无>	
	工作数据文件中的行数	16198	
缺失值处理	对缺失的定义	将用户定义的缺失值视为缺失。	
	使用的个案数	统计基于所有那些对于模型中的所有变量都具有有效数据的个案。	
语法	NOMREG 分组 (BASE=FIRST ORDER=ASCENDING) BY 没有HIP 是否妊娠期高血压 是否轻度PE 是否重度PE（含HELLP）
  /CRITERIA CIN(95) DELTA(0) MXITER(100) MXSTEP(5) CHKSEP(20) LCONVERGE(0) PCONVERGE(0.000001)
    SINGULAR(0.00000001)
  /MODEL
  /STEPWISE=PIN(.05) POUT(0.1) MINEFFECT(0) RULE(SINGLE) ENTRYMETHOD(LR) REMOVALMETHOD(LR)
  /INTERCEPT=INCLUDE
  /PRINT=PARAMETER SUMMARY LRT CPS STEP MFI.	
资源	处理程序时间	00:00:00.09	
	耗用时间	00:00:00.11	
